# Supplementary material for: Assessing Microplastics and Nanoparticles in the Surface Seawater of Venice Lagoon—Part I: Methodology of Research
Source: MDPI journal article supplement (doi:10.3390/ma17081759), 2024-04-11
Supplement: s1 [file s1]

Article

# Assessing Microplastics and Nanoparticles in the Surface Seawater of Venice Lagoon—Part I: Methodology of Research

Teresa Cecchi <sup>1</sup>, Davide Poletto <sup>2,\*</sup>, Andrei Constantin Berbecaru <sup>3</sup>, Elfrida Mihaela Cârstea <sup>4</sup> and Maria Râpă <sup>3,\*</sup>

<sup>1</sup> Chemistry Department, Istituto Technico Tecnologico, Via Montani 7, 63900 Fermo, Italy; cecchi.teresa@istitutomontani.edu.it

<sup>2</sup> Venice Lagoon Plastic Free, Castello 2641, 30122 Venice, Italy

<sup>3</sup> Faculty of Materials Science and Engineering, National University of Science and Technology Politehnica Bucharest, 060042 Bucharest, Romania; andrei.berbecaru@upb.ro

<sup>4</sup> National Institute of R&D for Optoelectronics INOE 2000, Atomistilor 409, 077125 Magurele, Romania; elfrida.carstea@inoe.ro

\* Correspondence: d.poletto@plasticfreevenice.org (D.P.); maria.rapa@upb.ro (M.R.)

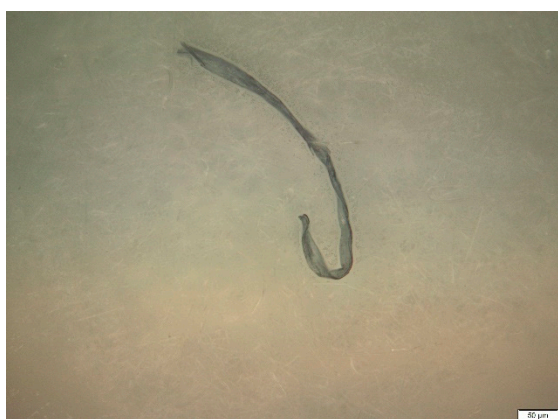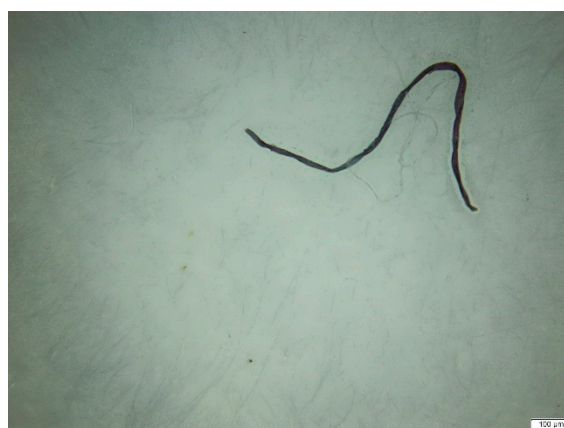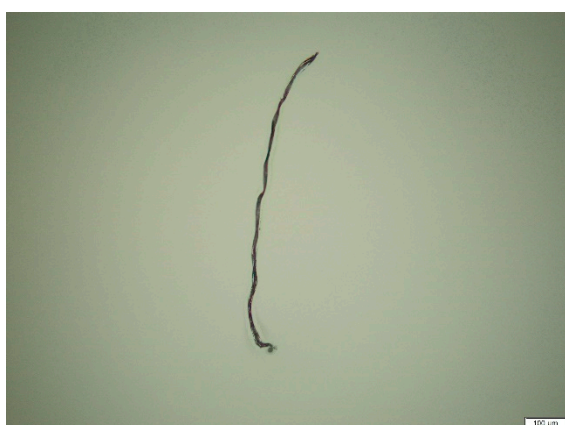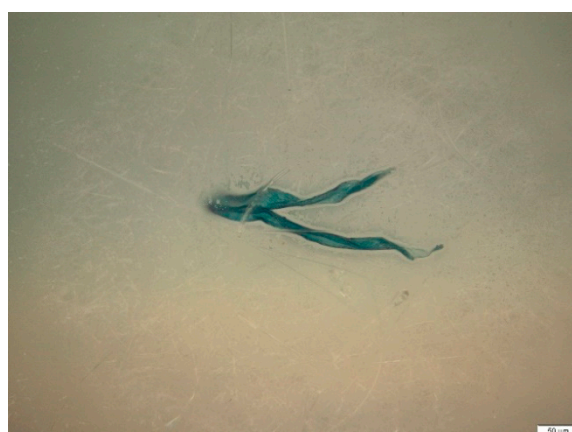

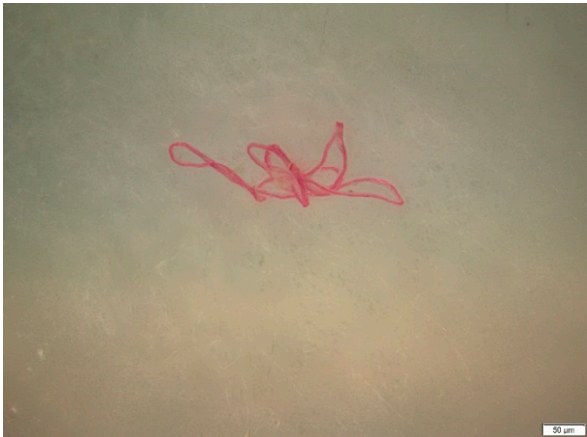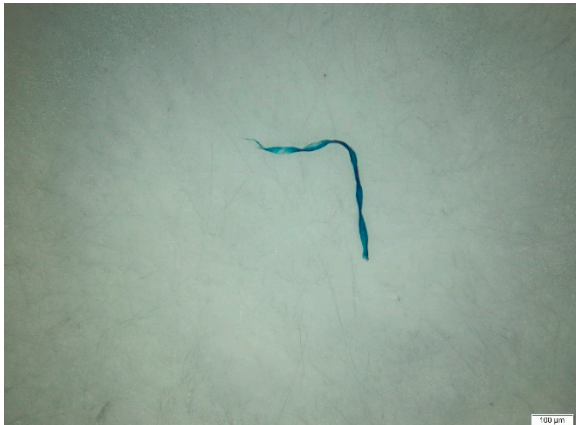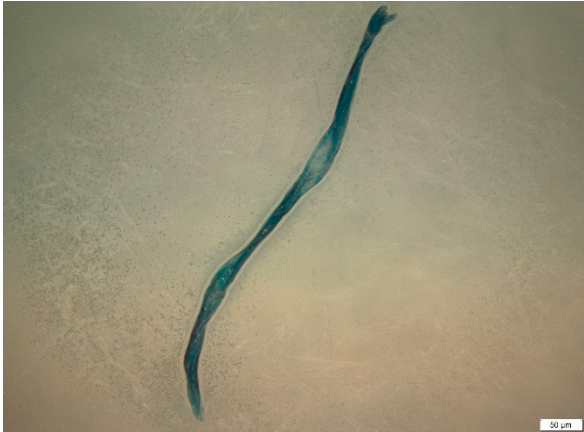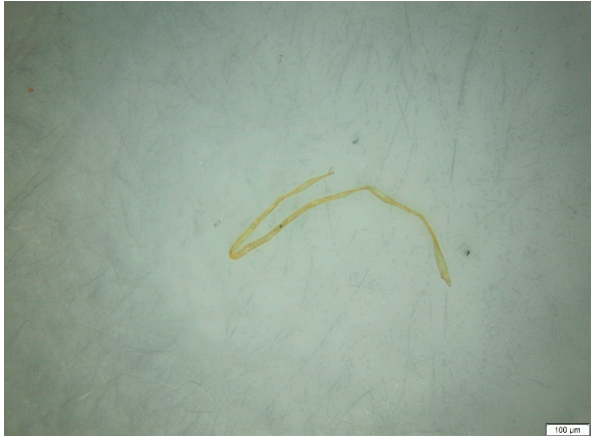

(a)

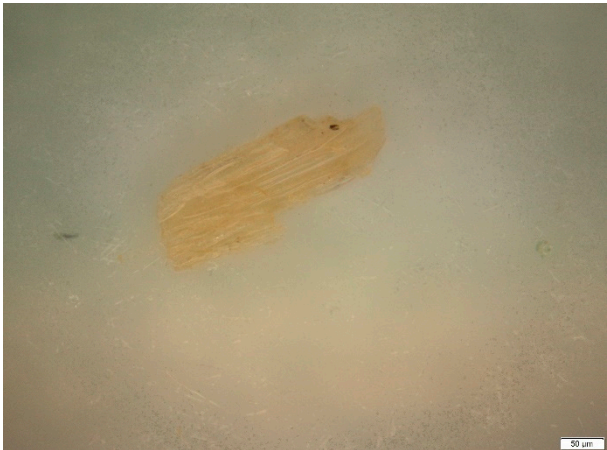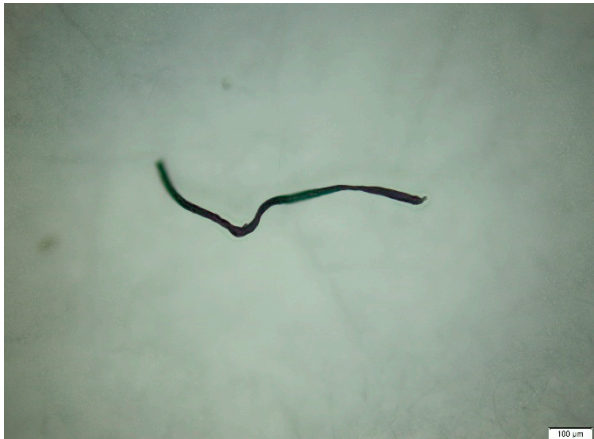



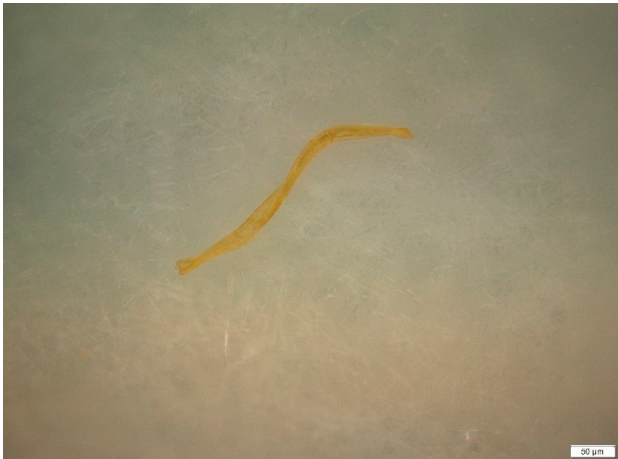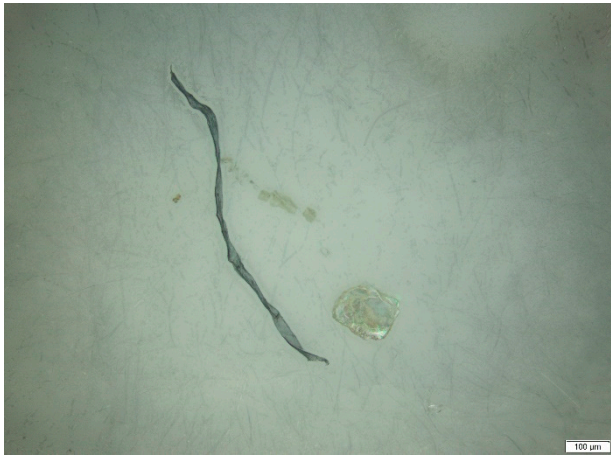

(b)

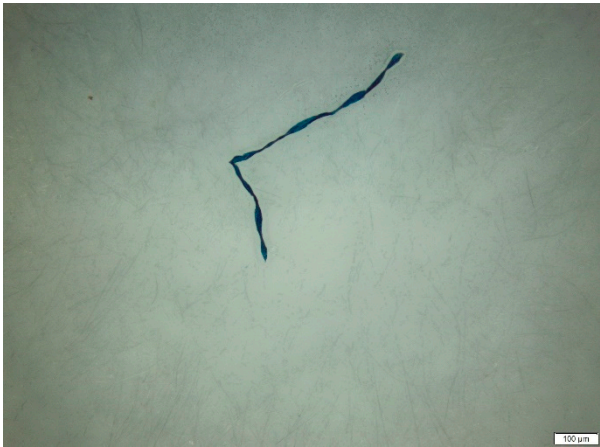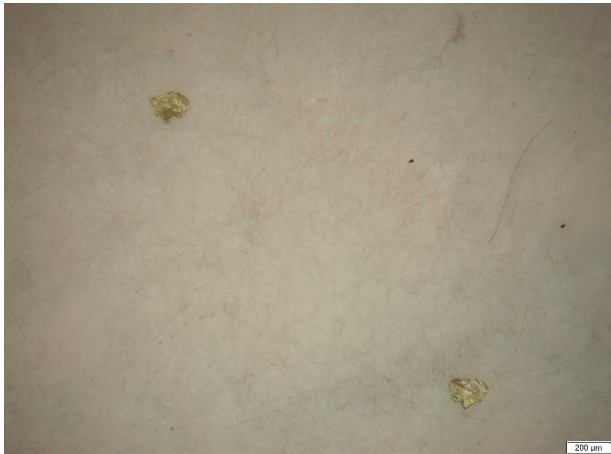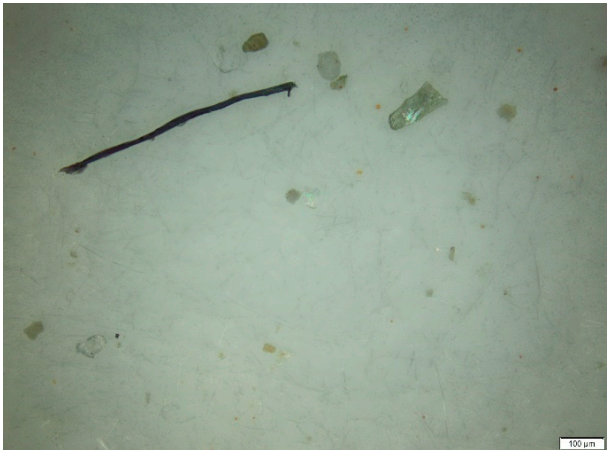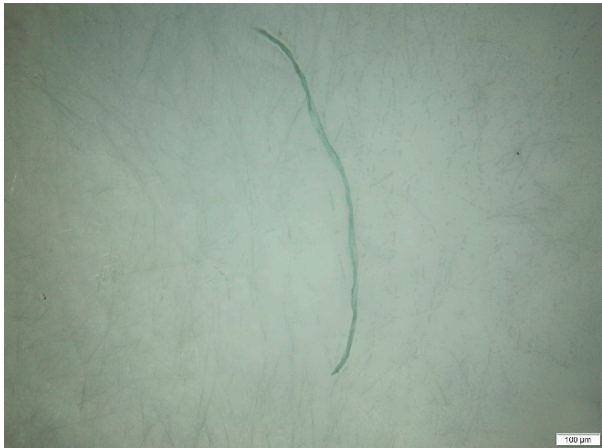

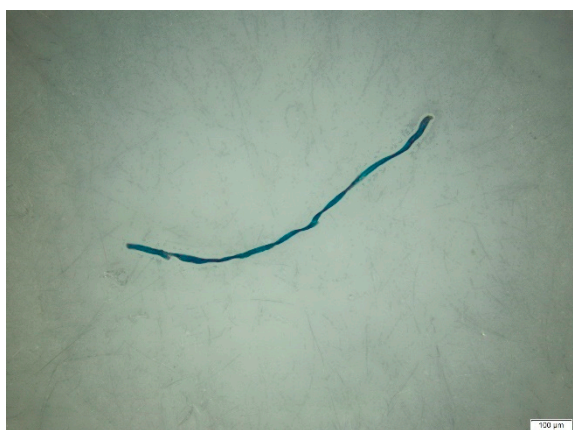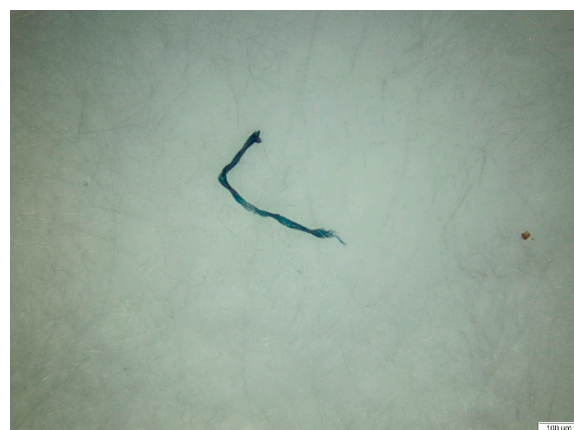

(c)

**Figure S1:** Some micrographs of MPs detected in seawater samples from Venice Lagoon: (a) Venice-Lido port inlet, (b) Grand Canal at the Rialto Bridge, and (c) Saint Marc basin.

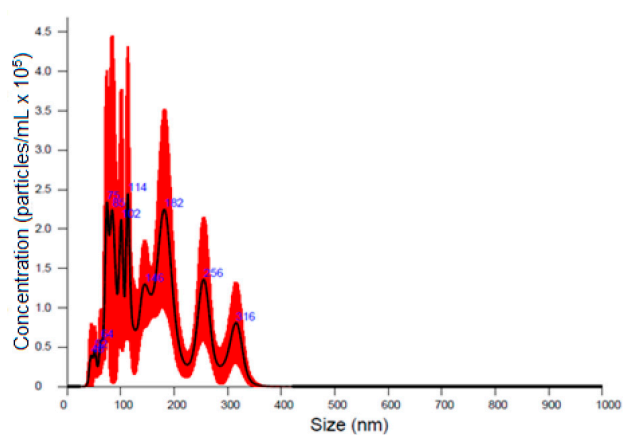

(a)

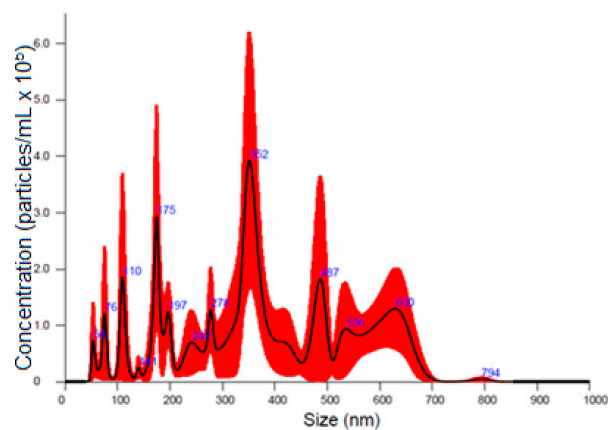

(b)

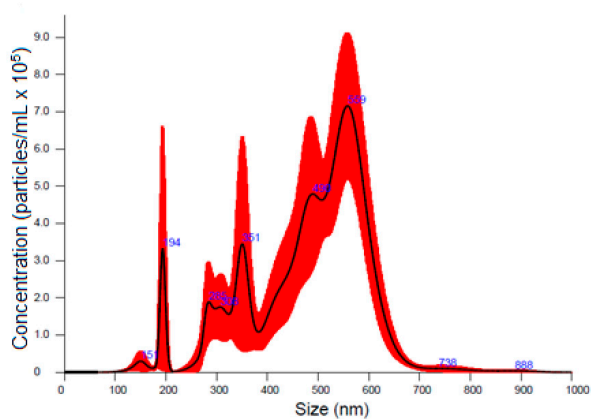

(c)

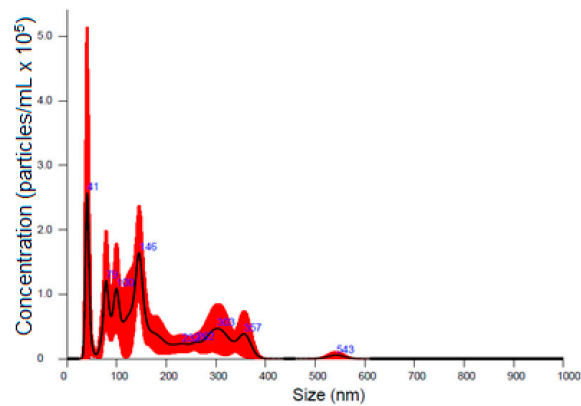

(d)

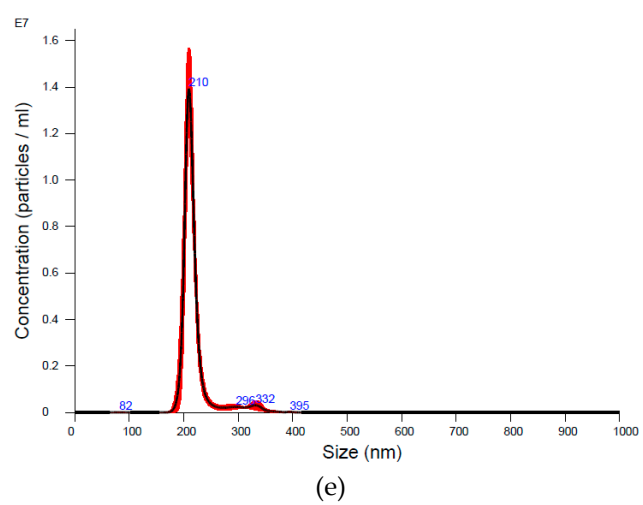

**Figure S2:** Averaged finite track length adjustment (FTLA) concentration/size for: (a) Venice- Lido port inlet, (b) Grand Canal at the Rialto Bridge, (c) Saint Marc basin, (d) Ultrapure water, and (e) Positive control.
